# Supplementary material
Source: publisher site journal article supplement (https://www.spandidos-publications.com/2730/downloadSupplementary)
Supplement: Supplementary file 1 [file downloadSupplementary]

Figure S1. Tissue samples were used to examine PGP9.5 expression by immunohistochemistry. PGP9.5 was used as a neuronal marker. (A) Normal breast tissue. (B and C) Ductal carcinoma *in situ*. (D) Invasive ductal carcinoma. Magnification, x40.

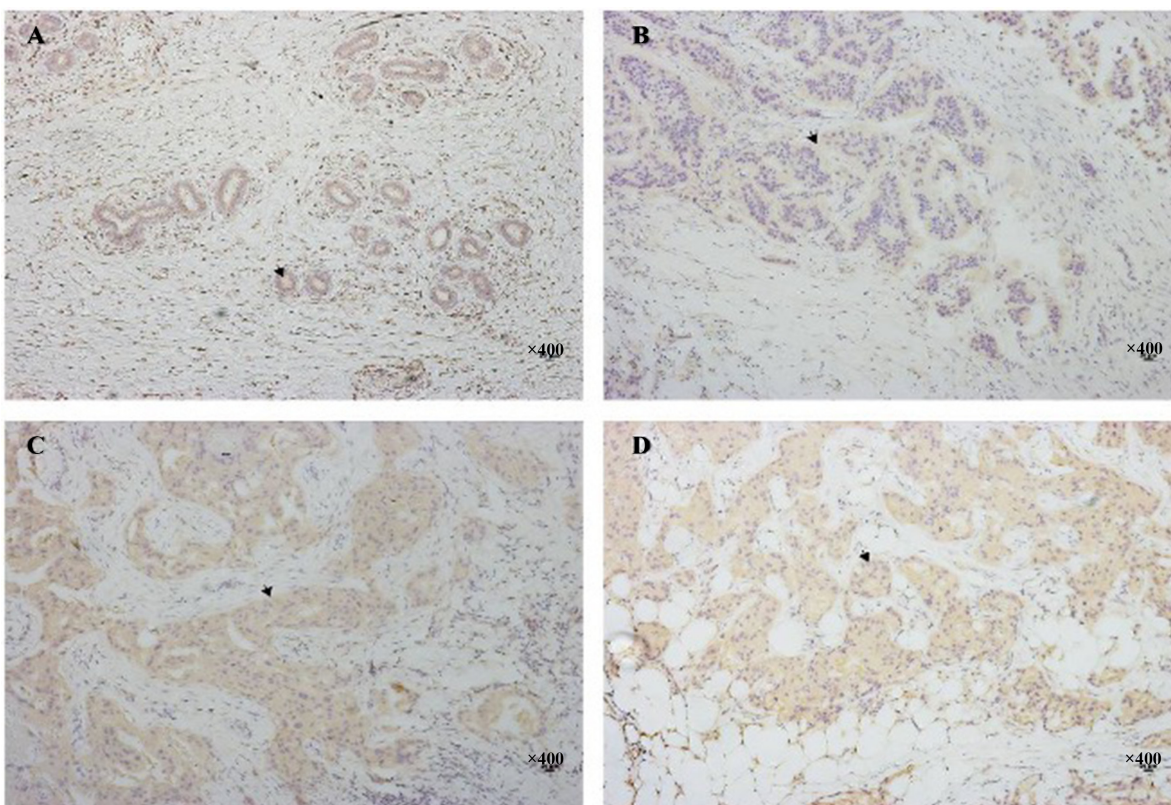

Figure S2. Preliminary selection of CRISPR/Cas9-edited cell by PCR and gel electrophoresis. Flow cytometry-sorted cells were preliminary selected by PCR and 2% agarose gel electrophoresis (visualized by ethidium bromide), and CRISPR/Cas9-edited cells were verified by sequencing. M, marker (DL2000 DNA ladder); 1-16, PCR production (726 bp).

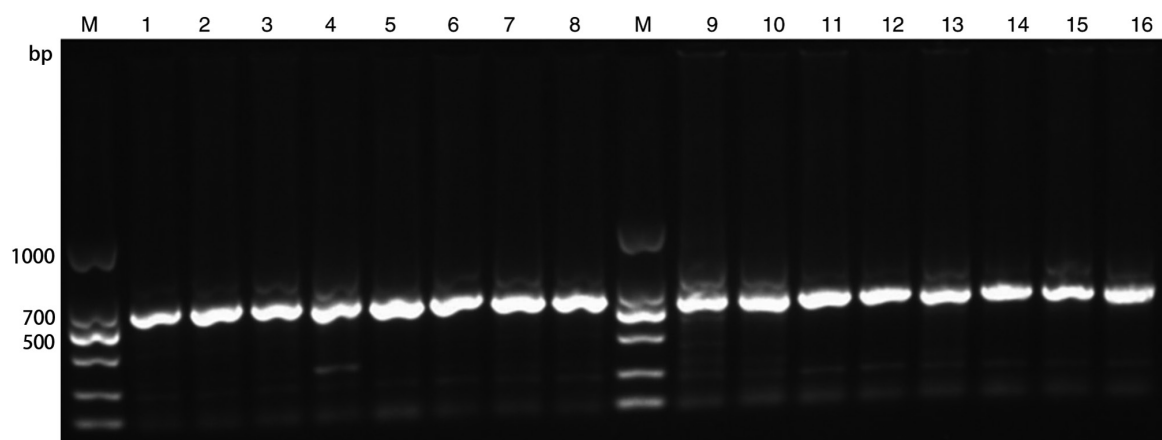

Table SI. Characteristics of patients.

| Parameters                         | Number |
|------------------------------------|--------|
| Age, $\leq 50$ years               | 44     |
| Age, $> 50$ years                  | 48     |
| Tumor size, $\leq 2$ cm            | 58     |
| Tumor size, $> 2$ cm               | 34     |
| Pathological grade, I              | 29     |
| Pathological grade, II-III         | 63     |
| Ductal carcinoma <i>in situ</i>    | 10     |
| Invasive ductal carcinoma          | 82     |
| Metastasis to axillary lymph nodes | 12     |
| Vascular invasion                  | 1      |
